# Supplementary material for: The surface plasmon resonance, thermal, support and size effect induced photocatalytic activity enhancement of Au/reduced graphene oxide for selective oxidation of benzylic alcohols
Source: Royal Society of Chemistry journal article supplement (doi:10.1039/c7cp05378a), 2017-01-01

## Electronic Supplementary Information

### The surface plasmon resonance, thermal, support and size effect induced photocatalytic activity enhancement of Au/reduced graphene oxide for selective oxidation of benzylic alcohols

Yanhui Zhang,<sup>\*ab</sup> Hongxu Guo,<sup>a</sup> Wen Weng<sup>a</sup> and Ming-Lai Fu<sup>b</sup>

<sup>a</sup> College of Chemistry and Environment, Fujian Province Key Laboratory of Modern Analytical Science and Separation Technology, Minnan Normal University, Zhangzhou, 363000, P. R. China

<sup>b</sup> CAS Key Laboratory of Urban Pollutant Conversion, Institute of Urban Environment, Chinese Academy of Science, Xiamen, 361021, P. R. China

\*To whom correspondence should be addressed. E-mail Address: [zhangyh@mnnu.edu.cn](mailto:zhangyh@mnnu.edu.cn)

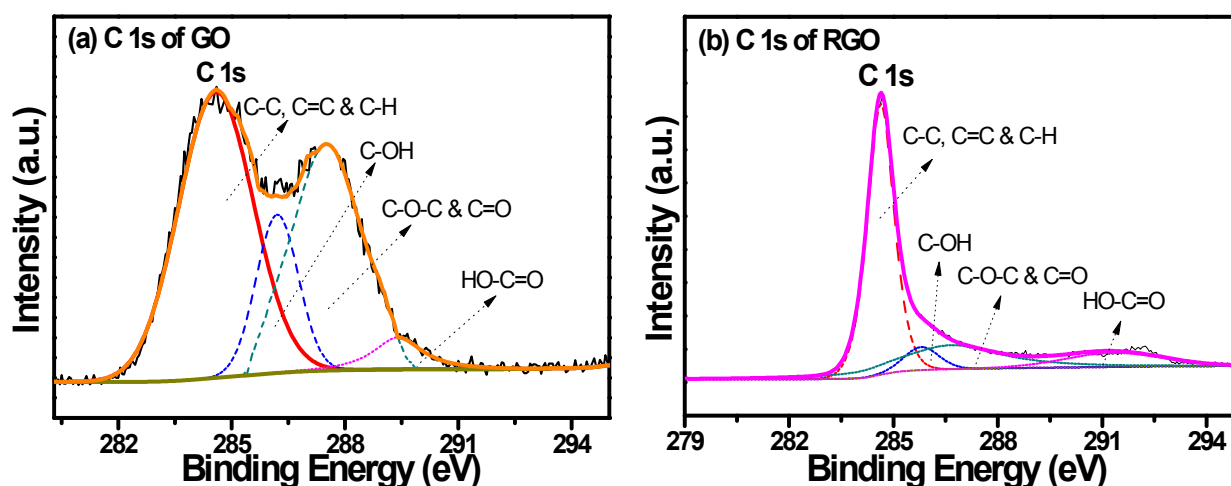

Fig. S1 C 1s XPS spectra of GO (a) and RGO (b).

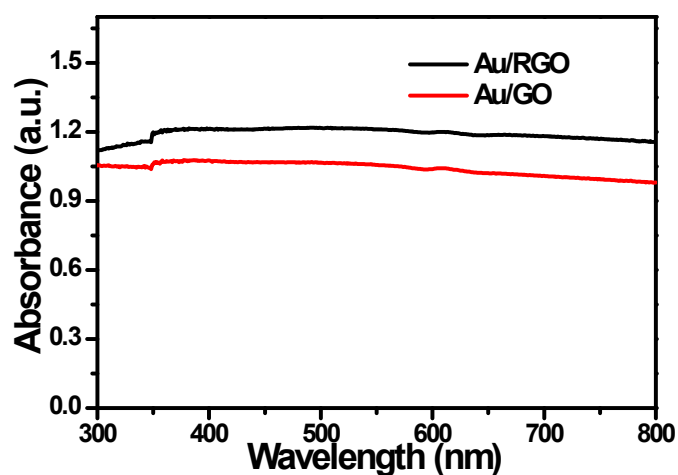

**Fig. S2** UV-vis diffuse reflectance spectra (DRS) of the as-prepared Au/RGO and Au/GO.

**Table S1** Summary of surface area of the as-prepared Au/RGO, Au/GO, Au/SiO<sub>2</sub>, Au/Al<sub>2</sub>O<sub>3</sub>, and Au/SBA-15.

| Samples                           | $S_{\text{BET}}$ (m <sup>2</sup> g <sup>-1</sup> ) |
|-----------------------------------|----------------------------------------------------|
| Au/RGO                            | 102                                                |
| Au/GO                             | 96                                                 |
| Au/SiO <sub>2</sub>               | 1                                                  |
| Au/Al <sub>2</sub> O <sub>3</sub> | 1                                                  |
| Au/SBA-15                         | 582                                                |

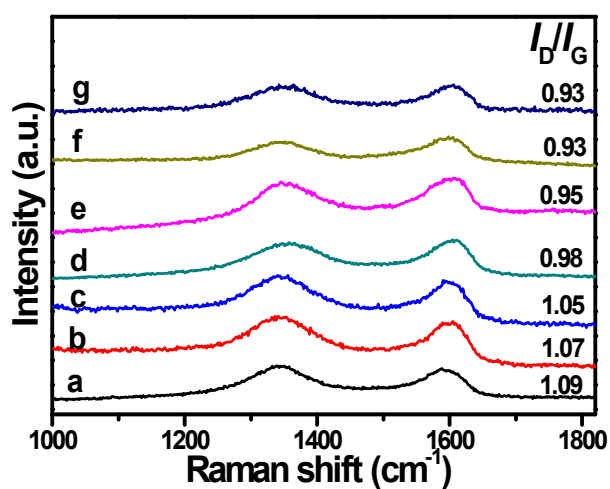

**Fig. S3** Raman spectra of the RGO for different concentration of NaBH<sub>4</sub> 0 M (a), 0.013 M (b), 0.026 M (c), 0.040 M (d), 0.053 M (e), 0.11 M (f), and 0.16 M (g) reduction of GO.

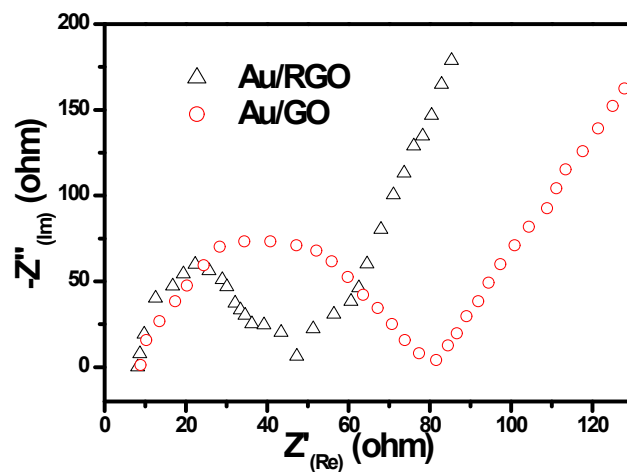

**Fig. S4** Nyquist impedance plots of Au/RGO and Au/GO.

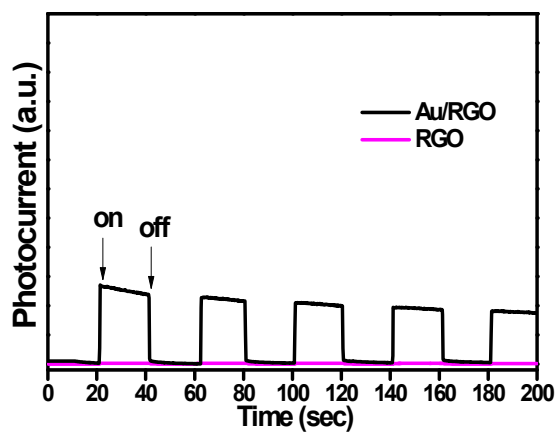

**Fig. S5** Photocurrent transient response of the samples Au/RGO and RGO in a 0.2 M Na<sub>2</sub>SO<sub>4</sub> aqueous solution without bias versus the Ag/AgCl electrode under visible light irradiation.

**Appendix** for illustrating the transfer of charge carriers in Au/RGO under visible light.

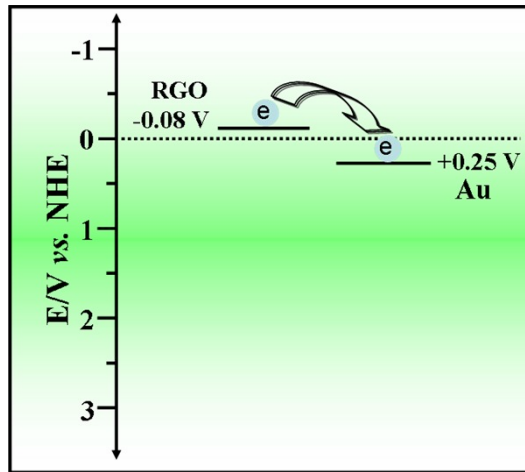

Supplement: c7cp05378a1.pdf [file c7cp05378a1.pdf]
